# Supplementary material for: Revisiting substorm events with preonset aurora
Source: Copernicus journal article supplement (doi:10.5194/angeo-36-1419-2018), 2018-10-19
Supplement: Supplementary file 1 [file angeo-36-1419-2018-supplement.zip]

Archive with 5 entries (5 files):
- sup_readme.pdf
- movie_s02.gif
- movie_s01.gif
- movie_s03.gif
- angeo-36-1419-2018-supplement-title-page.pdf
