# Supplementary material for: Revisiting substorm events with preonset aurora
Source: Copernicus journal article supplement (doi:10.5194/angeo-36-1419-2018), 2018-10-19
Supplement: Supplementary file 1 [file angeo-36-1419-2018-supplement.zip › angeo-36-1419-2018-supplement-title-page.pdf]

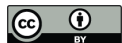

## *Supplement of*

# **Revisiting substorm events with preonset aurora**

**Yukinaga Miyashita and Akimasa Ieda**

*Correspondence to:* Yukinaga Miyashita ([miyasita@kasi.re.kr](mailto:miyasita@kasi.re.kr))

- [angeo-36-1419-2018-supplement-title-page.pdf](#)
- [movie\\_s01.gif](#)
- [movie\\_s02.gif](#)
- [movie\\_s03.gif](#)
- [sup\\_readme.pdf](#)

The copyright of individual parts of the supplement might differ from the CC BY 4.0 License.
