# Supplementary material for: Revisiting substorm events with preonset aurora
Source: Copernicus journal article supplement (doi:10.5194/angeo-36-1419-2018), 2018-10-19
Supplement: Supplementary file 1 [file angeo-36-1419-2018-supplement.zip › sup_readme.pdf]

# Supplement of Revisiting substorm events with preonset aurora

Yukinaga Miyashita<sup>1</sup> and Akimasa Ieda<sup>2</sup>

<sup>1</sup>Korea Astronomy and Space Science Institute, Daejeon, South Korea

<sup>2</sup>Institute for Space-Earth Environmental Research, Nagoya University, Nagoya, Japan

*Correspondence to:* Yukinaga Miyashita (miyasita@kasi.re.kr)

1. movie\_s01.gif: Movie of the auroral sequence corresponding to Fig. 2 and obtained from the THEMIS GBO all-sky imager at GILL from 0515:00 to 0536:00 UT on 25 February 2008, along with footprints of THEMIS D and E. The maximum count values of the black-white scale are 1800 for 0515:00 to 0530:30 UT and 3000 for the later times.
2. movie\_s02.gif: Movie of the auroral sequence corresponding to Fig. 5 and obtained from the THEMIS GBO all-sky imager at MCGR from 1050:00 to 1116:00 UT on 28 February 2008. The maximum count values of the black-white scale are 3000 for 1050:00 to 1111:00 UT and 4000 for the later times.
3. movie\_s03.gif: Movie of the auroral sequence corresponding to Fig. 8 and obtained from the THEMIS GBO all-sky imager at GILL from 0550:00 to 0615:00 UT on 5 March 2008. The maximum count values of the black-white scale are 1000 for 0550:00 to 0606:30 UT and 2000 for the later times.
