# Supplementary figures and images for: Revisiting substorm events with preonset aurora
Source: Copernicus journal article supplement (doi:10.5194/angeo-36-1419-2018), 2018-10-19

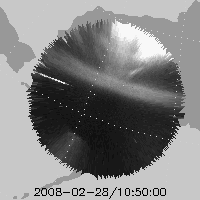

Supplement: Supplementary file 1 [file angeo-36-1419-2018-supplement.zip › movie_s02.gif]

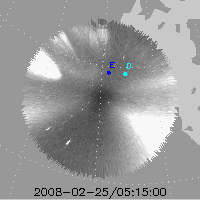

Supplement: Supplementary file 1 [file angeo-36-1419-2018-supplement.zip › movie_s01.gif]

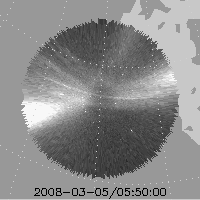

Supplement: Supplementary file 1 [file angeo-36-1419-2018-supplement.zip › movie_s03.gif]
